# Supplementary material for: Synthesis of magnetic metal–organic framework composites, Fe3O4-NH2@MOF-235, for the magnetic solid-phase extraction of benzoylurea insecticides from honey, fruit juice and tap water samples
Source: Royal Society of Chemistry journal article supplement (doi:10.1039/c9nj01988j), 2019-01-01
Supplement: c9nj01988j1.pdf [file c9nj01988j1.pdf]

## Supplementary Information:

### Synthesis of magnetic metal-organic frameworks composites $\text{Fe}_3\text{O}_4\text{-NH}_2\text{@MOF-235}$ for magnetic solid-phase extraction of benzoylurea insecticides from honey, fruit juice and tap water samples

Huixiao Duo,<sup>a,b</sup> Xiaofeng Lu,<sup>a</sup> Shuai Wang,<sup>a</sup> Licheng Wang,<sup>a\*</sup> Yong Guo<sup>a</sup> and Xiaojing Liang<sup>a\*</sup>

<sup>a</sup>CAS Key Laboratory of Chemistry of Northwestern Plant Resources and Key Laboratory for Natural Medicine of Gansu Province, Lanzhou Institute of Chemical Physics, Chinese Academy of Sciences, Lanzhou, Gansu 730000, People's Republic of China

<sup>b</sup>University of Chinese Academy of Sciences, Beijing 100049.

E-mail: xjliang@licp.cas.cn (Xiaojing Liang); wanglc@licp.cas.cn (Licheng Wang)

Phone: +86 931 4968266 Fax: +86 931 8277088

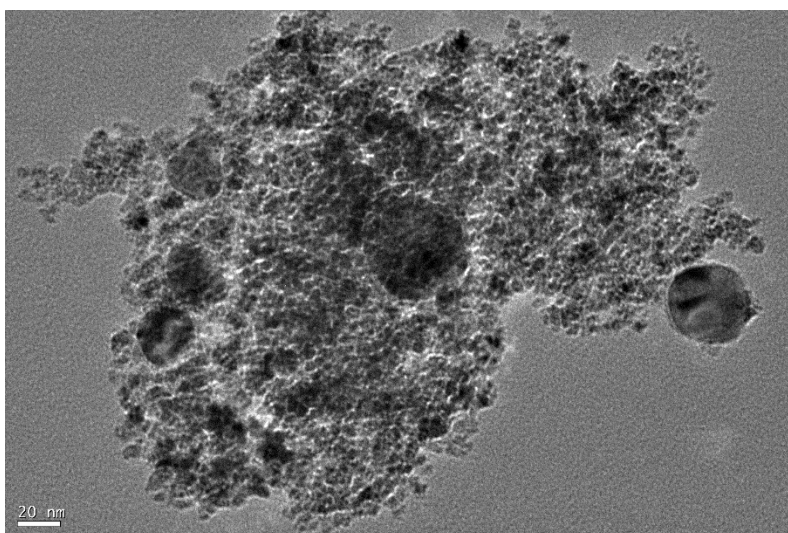

**Figure S1** The TEM micrographs of magnetic composites  $\text{Fe}_3\text{O}_4\text{-NH}_2\text{@MOF-235}$ .

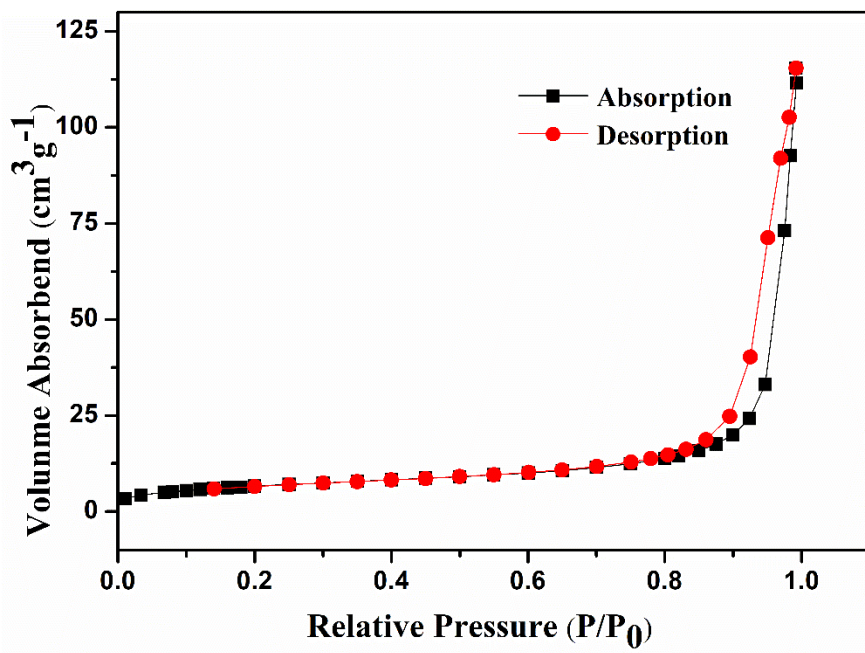

Figure S2 The N<sub>2</sub> adsorption-desorption isotherms of Fe<sub>3</sub>O<sub>4</sub>-NH<sub>2</sub>@MOF-235.

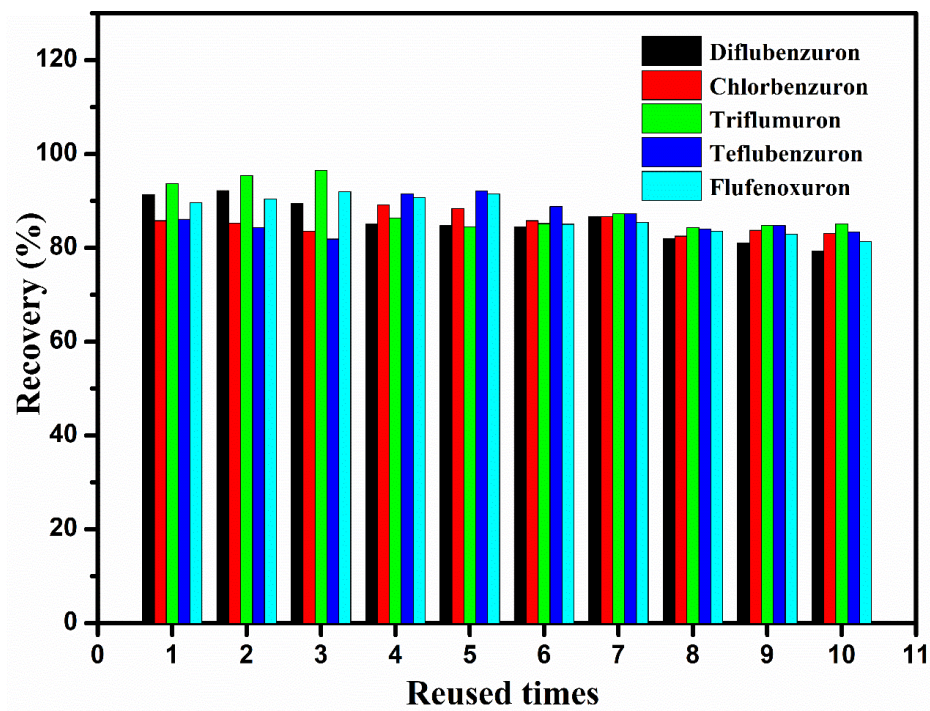

Figure S3 The reusability of magnetic Fe<sub>3</sub>O<sub>4</sub>-NH<sub>2</sub>@MOF-235.

**Table S1** Comparison of the methods for the determination of BUs.

| Method    | Extraction sorbent                                                                         | Linearity range ( $\mu\text{g/L}$ ) | LOD ( $\mu\text{g/L}$ ) | Ref.      |
|-----------|--------------------------------------------------------------------------------------------|-------------------------------------|-------------------------|-----------|
| MSPE-HPLC | MP-POP <sup>a</sup>                                                                        | 0.8-160                             | 0.08-0.2                | 6         |
| SPE-HPLC  | COF <sup>b</sup> -TpAzo                                                                    | 1.0-160                             | 0.1-0.2                 | 1         |
| MSPE-HPLC | $\beta$ -CDP <sup>c</sup> @Fe <sub>3</sub> O <sub>4</sub> Fe <sub>3</sub> O <sub>4</sub> - | 3.0-800                             | 0.2-0.8                 | 5         |
| MSPE-HPLC | NH <sub>2</sub> @MOF-235                                                                   | 1.0-300                             | 0.25-0.5                | This work |

1. <sup>a</sup>MP-POP: magnetic porphyrin-based porous organic polymers
2. <sup>b</sup>COF: covalent organic framework
3. <sup>c</sup> $\beta$ -CDP:  $\beta$ -cyclodextrin polymer
